# Supplementary material for: Highly efficacious antiviral protection of plants by small interfering RNAs identified in vitro
Source: Oxford University Press journal article supplement (doi:10.1093/nar/gkz678), 2019-08-03
Supplement: gkz678_supplemental_files.zip [file gkz678_supplemental_files.zip]

**Supplementary Table S1. DNA oligonucleotides used in this study**

| oligonucleotide | sequence                                                                       | purpose                                                                                     |
|-----------------|--------------------------------------------------------------------------------|---------------------------------------------------------------------------------------------|
| agf698_21U_1f   | TGTAATAGTTCATCCATGCCATGTGTATGATGATCACATTTCGTTATCTATTTTTACACATGGCAGGGATGAAC     | amiRNA cloning in binary vector pMDC32B-AtMIR390a-B/c                                       |
| agf698_21U_1r   | AATGTAGTTCATCCCTGCCATGTGTAAAAAATAGATAACGAATGTGATCATCATACACATGGCATGGATGAAC      | amiRNA cloning in binary vector pMDC32B-AtMIR390a-B/c                                       |
| agf698_21A_1f   | TGTAAGTTCATCCATGCCATGTGTATGATGATCACATTTCGTTATCTATTTTTACACATGGCAGGGATGAAC       | amiRNA cloning in binary vector pMDC32B-AtMIR390a-B/c                                       |
| agf698_21A_1r   | AATGAAGTTCATCCCTGCCATGTGTAAAAAATAGATAACGAATGTGATCATCATACACATGGCATGGATGAAC      | amiRNA cloning in binary vector pMDC32B-AtMIR390a-B/c                                       |
| asiRNA179m_1f   | TGTAATGATGGTCTCCATGTCCGTTGATGATGATCACATTTCGTTATCTATTTTTCAAGCGACATTGAGACCATCA   | amiRNA cloning in binary vector pMDC32B-AtMIR390a-B/c                                       |
| asiRNA179m_1r   | AATGTGATGGTCTCAATGTCCGTTGAAAAAATAGATAACGAATGTGATCATCATCAAGCGACATTGGAGACCATCA   | amiRNA cloning in binary vector pMDC32B-AtMIR390a-B/c                                       |
| asiRNA186m_1f   | TGTAATTCCTCTTGATGGTCTCCATGATGATGATCACATTTCGTTATCTATTTTTTCATGGAGACCCCTCAAGAGAAT | amiRNA cloning in binary vector pMDC32B-AtMIR390a-B/c                                       |
| asiRNA186m_1r   | AATGATTCCTCTTGAGGGTCTCCATGAAAAAATAGATAACGAATGTGATCATCATATGGAGACCATCAAGAGAAT    | amiRNA cloning in binary vector pMDC32B-AtMIR390a-B/c                                       |
| asiRNA207m_1f   | TGTAATCTCTTTCTTAGGCCAAATCATGATGATCACATTTCGTTATCTATTTTTTGCCCTCAGAAAGAGAT        | amiRNA cloning in binary vector pMDC32B-AtMIR390a-B/c                                       |
| asiRNA207m_1r   | AATGATCTCTTTCTTAGGCCAAATCAAAAAATAGATAACGAATGTGATCATCATGATTTGGCCCTAAGAAAGAGAT   | amiRNA cloning in binary vector pMDC32B-AtMIR390a-B/c                                       |
| asiRNA209m_1f   | TGTAATACTCTTTCTTAGGCCAAATGATGATCACATTTCGTTATCTATTTTTTTGGCCCTAATAAGAGATT        | amiRNA cloning in binary vector pMDC32B-AtMIR390a-B/c                                       |
| asiRNA209m_1r   | AATGAAATCTCTTTATTAGGCCAAAAAATAGATAACGAATGTGATCATCATTTTGGCCCTAAGAAAGAGATT       | amiRNA cloning in binary vector pMDC32B-AtMIR390a-B/c                                       |
| asiRNA221m_1f   | TGTAATAACCCACAAAAATCTCTTATGATGATCACATTTCGTTATCTATTTTTTAAGAGATTTTGGTGGGTGATT    | amiRNA cloning in binary vector pMDC32B-AtMIR390a-B/c                                       |
| asiRNA221m_1r   | AATGAATCACCACAAAAATCTCTTAAAAAATAGATAACGAATGTGATCATCATAGAGATTTTGGTGGGTGATT      | amiRNA cloning in binary vector pMDC32B-AtMIR390a-B/c                                       |
| asiRNA228m_1f   | TGTAATCGCGAAATCACCACAAAAATGATGATCACATTTCGTTATCTATTTTTTTGGTGGGTGATTTCGCGAT      | amiRNA cloning in binary vector pMDC32B-AtMIR390a-B/c                                       |
| asiRNA228m_1r   | AATGATCGCGAAATCAACCCAAAAAATAGATAACGAATGTGATCATCATTTTGGTGGGTGATTTCGCGAT         | amiRNA cloning in binary vector pMDC32B-AtMIR390a-B/c                                       |
| asiRNA238m_1f   | TGTAATTCACCTCCGATCGCGAAATCATGATGATCACATTTCGTTATCTATTTTTTGAATTCGCGAGCGAGTGAAT   | amiRNA cloning in binary vector pMDC32B-AtMIR390a-B/c                                       |
| asiRNA238m_1r   | AATGATTCACCTCCGCTCGCGAAATCAAAAAATAGATAACGAATGTGATCATCATGATTTTCGCGATCGGAGTGAAT  | amiRNA cloning in binary vector pMDC32B-AtMIR390a-B/c                                       |
| asiRNA3243m_1f  | TGTAATTCGCCAACTCAACTCTATCATGATGATCACATTTCGTTATCTATTTTTTGATAGAGTTGCGTTGGCGAAT   | amiRNA cloning in binary vector pMDC32B-AtMIR390a-B/c                                       |
| asiRNA3243m_1r  | AATGATTCGCCAACGCAACTCTATCAAAAAATAGATAACGAATGTGATCATCATGATTTGAGTTGAGTTGGCGAAT   | amiRNA cloning in binary vector pMDC32B-AtMIR390a-B/c                                       |
| asiRNA3701m_1f  | TGTAATAAACCGCATCTGTCGTAACCTATGATGATCACATTTCGTTATCTATTTTTTAGTACAGCCGTCGCTTTTT   | amiRNA cloning in binary vector pMDC32B-AtMIR390a-B/c                                       |
| asiRNA3701m_1r  | AATGAAAAACGCGACGCTGTCGTAACCTAAAAAATAGATAACGAATGTGATCATCATAGTACAGACAGCTGCTTTTT  | amiRNA cloning in binary vector pMDC32B-AtMIR390a-B/c                                       |
| asiRNA3722m_1f  | TGTAATTAGAGACAGTACAAATTTATGATGATGATCACATTTCGTTATCTATTTTTTCATAAATTGTCCTGTCTCTAA | amiRNA cloning in binary vector pMDC32B-AtMIR390a-B/c                                       |
| asiRNA3722m_1r  | AATGTTAGAGACAGGACAAATTTATGAAAAAATAGATAACGAATGTGATCATCATATAAATTGTACTGTCTCTAA    | amiRNA cloning in binary vector pMDC32B-AtMIR390a-B/c                                       |
| asiRNA3939m_1f  | TGTAATTCACGTGTAGCTTGTTCCTCATGATGATCACATTTCGTTATCTATTTTTTAGGGAACAGATAACAGTGAA   | amiRNA cloning in binary vector pMDC32B-AtMIR390a-B/c                                       |
| asiRNA3939m_1r  | AATGTTTCACGTGTATCTTGTTCCTAAAAAATAGATAACGAATGTGATCATCATAGGGAACAGCTAACAGTGAA     | amiRNA cloning in binary vector pMDC32B-AtMIR390a-B/c                                       |
| T7pro2G         | CCCTAATACGACTCACAATAGG                                                         | generation of template DNA for <i>in vitro</i> transcription of TBSV fragment A, (+)-strand |
| TVGM_J51r       | CCTTAAGTTCCTTCGCCGGC                                                           | generation of template DNA for <i>in vitro</i> transcription of TBSV fragment A, (+)-strand |
| T7TVGM_J52f     | TGTAATACGACTCACTATAGGAGCCGCGAAGGGAACCTTAAG                                     | generation of template DNA for <i>in vitro</i> transcription of TBSV fragment B, (+)-strand |
| TVGM_J52r       | CATTGTACCTCGGGTTTCGAG                                                          | generation of template DNA for <i>in vitro</i> transcription of TBSV fragment B, (+)-strand |
| T7TVGM_J53f     | TGTAATACGACTCACTATAGGACGACCTCGGGTGATTACG                                       | generation of template DNA for <i>in vitro</i> transcription of TBSV fragment C, (+)-strand |
| TVGM_J53r       | GTAATTGCTTTGTACTCACCGG                                                         | generation of template DNA for <i>in vitro</i> transcription of TBSV fragment C, (+)-strand |
| T7TVGM_J54f     | TGTAATACGACTCACTATAGGACACACACGAGGATAGACAC                                      | generation of template DNA for <i>in vitro</i> transcription of TBSV fragment D, (+)-strand |
| TVGM_J54r       | CGCAGGACACACTAAATTAGAG                                                         | generation of template DNA for <i>in vitro</i> transcription of TBSV fragment D, (+)-strand |
| T7TVGM_J55f     | TGTAATACGACTCACTATAGGTATCACACTCTGCCACAGTAC                                     | generation of template DNA for <i>in vitro</i> transcription of TBSV fragment E, (+)-strand |
| TVDIWT1r        | GGGCTGCATTTCTGCAATTGTC                                                         | generation of template DNA for <i>in vitro</i> transcription of TBSV fragment E, (+)-strand |
| VtmTra1f        | GGAAATTCCTCAGGATTTCTCGAC                                                       | generation of template DNA for <i>in vitro</i> transcription of TBSV fragment A, (-)-strand |
| T7TVGM1r        | TGTAATACGACTCACTATAGGCCTTAAGTTCCTTCGCCGGC                                      | generation of template DNA for <i>in vitro</i> transcription of TBSV fragment B, (-)-strand |
| TraTVGM_J52f    | GGAGCCGGCAGGGAACCTTAAG                                                         | generation of template DNA for <i>in vitro</i> transcription of TBSV fragment B, (-)-strand |
| T7TVGM_J52r     | CCCTAATACGACTCACTATAGGCAATTGTACCTCGGGTTTCGAG                                   | generation of template DNA for <i>in vitro</i> transcription of TBSV fragment C, (-)-strand |
| TraTVGM_J53f    | GGCAGCACCTCGGGTGATTACG                                                         | generation of template DNA for <i>in vitro</i> transcription of TBSV fragment C, (-)-strand |
| T7TVGM_J53r     | CCCTAATACGACTCACTATAGGTAAATGCTTTGTACTCACCGG                                    | generation of template DNA for <i>in vitro</i> transcription of TBSV fragment D, (-)-strand |
| TraTVGM_J54f    | GGCAGCACGCGAGGATAGACAC                                                         | generation of template DNA for <i>in vitro</i> transcription of TBSV fragment D, (-)-strand |
| T7TVGM_J54r     | CCCTAATACGACTCACTATAGGCGCAGGACACACTAAATTAGAG                                   | generation of template DNA for <i>in vitro</i> transcription of TBSV fragment E, (-)-strand |
| TraTVGM_J55f    | GGTATCACACTCTGCCACAGTAC                                                        | generation of template DNA for <i>in vitro</i> transcription of TBSV fragment E, (-)-strand |
| T7TVmTra1r      | CCCTAATACGACTCACTATAGGGCTGCATTTCTGCAATTGTTCC                                   | replacement of the target site of siRNA gF698 in plasmid gPFP-C1 by two <i>Bsp</i> I sites  |
| pGFP-C1mut1f    | GGAACTACAGACACGCTGCTG                                                          | replacement of the target site of siRNA gF698 in plasmid gPFP-C1 by two <i>Bsp</i> I sites  |
| pGFP-C1mut1r    | CATGCCATGGTtGGAAGACTcATCCCAGCAGCTGTTACAAAC                                     | replacement of the target site of siRNA gF698 in plasmid gPFP-C1 by two <i>Bsp</i> I sites  |
| pGFP-C1mut2f    | CATGCCATGGTtGGAAGACTcATCAAGTCCGACTCAGATCTC                                     | replacement of the target site of siRNA gF698 in plasmid gPFP-C1 by two <i>Bsp</i> I sites  |
| pGFP-C1mut2r    | TTGCCGATTTTCGCCCTATTGG                                                         | insertion of the target site of a TBSV siRNA in plasmid gPFP-C1                             |
| tsTVsi179m1f    | GGATACAAGCGACATGGAGACCATCA                                                     | insertion of the target site of a TBSV siRNA in plasmid gPFP-C1                             |
| tsTVsi179m1r    | TGTAATGATGGTCTCCATGTCCGTTGT                                                    | insertion of the target site of a TBSV siRNA in plasmid gPFP-C1                             |
| tsTVsi1470m1f   | GGATGAGCCGTGGAGAGTCTGCATAT                                                     | insertion of the target site of a TBSV siRNA in plasmid gPFP-C1                             |
| tsTVsi1470m1r   | TGTAATATGCAGACTCTCCACGGCTC                                                     | insertion of the target site of a TBSV siRNA in plasmid gPFP-C1                             |
| tsTVsi1575m1f   | GGATCTCGGGTGATTTCAGCCTCGAA                                                     | insertion of the target site of a TBSV siRNA in plasmid gPFP-C1                             |
| tsTVsi1575m1r   | TGTAATTCGAGGCTGAATCACCCGAG                                                     | insertion of the target site of a TBSV siRNA in plasmid gPFP-C1                             |
| tsTVsi1717m1f   | GGATAGGTGCAATTTTCGGGCTAA                                                       | insertion of the target site of a TBSV siRNA in plasmid gPFP-C1                             |
| tsTVsi1717m1r   | TGTAATTCGCGCGAAAAATGCACCT                                                      | insertion of the target site of a TBSV siRNA in plasmid gPFP-C1                             |
| tsTVsi13243m1f  | GGATTGATAGAGTTGAGTTGGCGAAT                                                     | insertion of the target site of a TBSV siRNA in plasmid gPFP-C1                             |
| tsTVsi13243m1r  | TGTAATTCGCCAACTCAACTCTATCA                                                     | insertion of the target site of a TBSV siRNA in plasmid gPFP-C1                             |
| tsTVsi13516m1f  | GGATTGGCGCTCTTGTCAACAGATCT                                                     | insertion of the target site of a TBSV siRNA in plasmid gPFP-C1                             |
| tsTVsi13516m1r  | TGTAAGATGCTGTGACAAGAGCGCCA                                                     | insertion of the target site of a TBSV siRNA in plasmid gPFP-C1                             |
| tsTVsi3701m1f   | GGATTAGGTACAGACAGTGCCTTTTT                                                     | insertion of the target site of a TBSV siRNA in plasmid gPFP-C1                             |
| tsTVsi3701m1r   | TGTAATAAACCGCACTGTCTGTACTTA                                                    | insertion of the target site of a TBSV siRNA in plasmid gPFP-C1                             |
| tsTVsi3722m1f   | GGATTCAATAAATTGTACTGTCTCTAA                                                    | insertion of the target site of a TBSV siRNA in plasmid gPFP-C1                             |
| tsTVsi3722m1r   | TGTAATTAGAGACAGTACAAATTTATGA                                                   | insertion of the target site of a TBSV siRNA in plasmid gPFP-C1                             |
| tsTVsi13758m1f  | GGATTGACATTCACATCTACCGGTAT                                                     | insertion of the target site of a TBSV siRNA in plasmid gPFP-C1                             |
| tsTVsi13758m1r  | TGTAATAACCGGTAGATGTGAATGTCA                                                    | insertion of the target site of a TBSV siRNA in plasmid gPFP-C1                             |
| tsTVsi1939m1f   | GGATTAGGGAAACAGCTAACAGTGAA                                                     | insertion of the target site of a TBSV siRNA in plasmid gPFP-C1                             |
| tsTVsi1939m1r   | TGTAATTCACGTGTAGCTTGTTCCTTA                                                    | insertion of the target site of a TBSV siRNA in plasmid gPFP-C1                             |
| tsTVsi4044m1f   | GGATTAAACGATGAGACGAATTCGAAT                                                    | insertion of the target site of a TBSV siRNA in plasmid gPFP-C1                             |
| tsTVsi4044m1r   | TGTAATTCGAATTCGTCTCATCGTTTA                                                    | insertion of the target site of a TBSV siRNA in plasmid gPFP-C1                             |
| tsTVsi4418m1f   | GGATAAGCGGAGTAAAGACAGACTCTT                                                    | insertion of the target site of a TBSV siRNA in plasmid gPFP-C1                             |
| tsTVsi4418m1r   | TGTAAGAGGTCTGTCTTACTCGCCTT                                                     | insertion of the target site of a TBSV siRNA in plasmid gPFP-C1                             |
| HDVrib1f        | GGGTCCGATGGCATCTCCAC                                                           | fusion of a HDV ribozyme-encoding sequence to TBSV cDNA                                     |
| HDVrib3r        | CGGAATTCCTAGACTTCCTCCCTTAGCCTACCGAAG                                           | fusion of a HDV ribozyme-encoding sequence to TBSV cDNA                                     |
| TBSV_BGW_1f     | TTTGGTCTCGATCCGGAATTCCTCAGGATTTCTCG                                            | cloning of TBSV cDNA including a HDV ribozyme-encoding sequence in binary vector pVM-BGW    |
| TBSV_BGWRib_2r  | TTTGGTCTCTAAGCCGGAATTCCTCAGACTTCTCCG                                           | cloning of TBSV cDNA including a HDV ribozyme-encoding sequence in binary vector pVM-BGW    |
| BGWmCherry2f    | GACCATGAAGACCGATCCATGGTGAGCAAGGCGAGG                                           | cloning of mCherry ORF in binary vector                                                     |
| BGWmCherry2r    | GACCATGAAGACCGAAGCTTACTTTGTACAGCTCGTCCATG                                      | cloning of mCherry ORF in binary vector                                                     |

**Supplementary Table S2.** RNA oligonucleotides used in this study

| oligonucleotide | sequence               | purpose                             |
|-----------------|------------------------|-------------------------------------|
| gf698-21U gs    | uaguucauccaugccaugugu  | guide strand of gf698 siRNA, 5'U    |
| gf698-21U ps    | acauggcauggaugaacuaaua | passenger strand of gf698 siRNA     |
| gf698-21A gs    | aaguucauccaugccaugugu  | guide strand of gf698 siRNA, 5'A    |
| gf698-21A ps    | acauggcauggaugaacuuua  | passenger strand of gf698 siRNA     |
| si179 gs        | ugauggucuccaugucgcuug  | guide strand of TBSV siRNA 179      |
| si179 ps        | agcgacaugggagaccaucaag | passenger strand of TBSV siRNA 179  |
| si186 gs        | auucucuugauggucuccaug  | guide strand of TBSV siRNA 186      |
| si186 ps        | uggagaccaucaagagaauga  | passenger strand of TBSV siRNA 186  |
| si207 gs        | aucucuuuuuuaggccaaauc  | guide strand of TBSV siRNA 207      |
| si207 ps        | uuuggccuaagaaagagauuu  | passenger strand of TBSV siRNA 207  |
| si209 gs        | aaucucuuuuuuaggccaaa   | guide strand of TBSV siRNA 209      |
| si209 ps        | uggccuaagaaagagauuuuu  | passenger strand of TBSV siRNA 209  |
| si221 gs        | aaucacccacaaaaaucucu   | guide strand of TBSV siRNA 221      |
| si221 ps        | gagauuuuuugugggugauuuc | passenger strand of TBSV siRNA 221  |
| si228 gs        | aucgcgaaaucacccacaaaa  | guide strand of TBSV siRNA 228      |
| si228 ps        | uugugggugauuucgcgaucg  | passenger strand of TBSV siRNA 228  |
| si238 gs        | auucacuccgaucgcgaaauc  | guide strand of TBSV siRNA 238      |
| si238 ps        | uuucgcgaucggagugaaauag | passenger strand of TBSV siRNA 238  |
| si1470 gs       | auaugcagacucuccacggcu  | guide strand of TBSV siRNA 1470     |
| si1470 ps       | ccguggagagucugcauauca  | passenger strand of TBSV siRNA 1470 |
| si1575 gs       | uuucgaggcugaauaccccga  | guide strand of TBSV siRNA 1575     |
| si1575 ps       | gggugauucagccucgaaacc  | passenger strand of TBSV siRNA 1575 |
| si1717 gs       | uuuagccccggaaaauugcacc | guide strand of TBSV siRNA 1717     |
| si1717 ps       | ugcaauuuuccgggcuaaaug  | passenger strand of TBSV siRNA 1717 |
| si3243 gs       | auucgccaacucaacucuauc  | guide strand of TBSV siRNA 3243     |
| si3243 ps       | uagaguugaguuggcgaaaua  | passenger strand of TBSV siRNA 3243 |
| si3516 gs       | agaugcugugacaagagcgcc  | guide strand of TBSV siRNA 3516     |
| si3516 ps       | cgcucuugucacagcaucugg  | passenger strand of TBSV siRNA 3516 |
| si3701 gs       | aaaaacgcacugucuguaccu  | guide strand of TBSV siRNA 3701     |
| si3701 ps       | guacagacagugcguuuuuua  | passenger strand of TBSV siRNA 3701 |
| si3722 gs       | uuagagacaguacaauuuuug  | guide strand of TBSV siRNA 3722     |
| si3722 ps       | uaauuuguacugucucuaacc  | passenger strand of TBSV siRNA 3722 |
| si3758 gs       | auaccgguagaugugaauguc  | guide strand of TBSV siRNA 3758     |
| si3758 ps       | cauucacauuaccgguauca   | passenger strand of TBSV siRNA 3758 |
| si3939 gs       | uucacuguuagcuuguucccu  | guide strand of TBSV siRNA 3939     |
| si3939 ps       | ggaacaagcuaacagugaacg  | passenger strand of TBSV siRNA 3939 |
| si4044 gs       | auucgaaauucgucucaucguu | guide strand of TBSV siRNA 4044     |
| si4044 ps       | cgaugagacgaaauucgaauc  | passenger strand of TBSV siRNA 4044 |
| si4418 gs       | aagagucugucuuaucgcgccu | guide strand of TBSV siRNA 4418     |
| si4418 ps       | gcgaguaagacagacucuua   | passenger strand of TBSV siRNA 4418 |
